# Supplementary material for: Controlled underdilation using novel VIATORR® controlled expansion stents improves survival after transjugular intrahepatic portosystemic shunt implantation
Source: PubMed Central journal article supplement — JHEP Rep. 2021 Mar 3;3(3):100264. doi: 10.1016/j.jhepr.2021.100264 (PMC8113713; doi:10.1016/j.jhepr.2021.100264), 2021-03-03
Supplement: mmc1.pdf [file mmc1.pdf]

**Controlled underdilation using novel Viatorr® controlled expansion  
stents improves survival after transjugular intrahepatic  
portosystemic shunt implantation**

Michael Praktiknjo, Jasmin Abu-Omar, Johannes Chang, Daniel Thomas, Christian Jansen, Patrick Kupczyk, Filippo Schepis, Juan Carlos Garcia-Pagan, Manuela Merli, Carsten Meyer, Christian P. Strassburg, Claus C. Pieper, Jonel Trebicka

Table of contents

|               |   |
|---------------|---|
| Table S1..... | 2 |
| Fig. S1.....  | 3 |
| Fig. S2.....  | 4 |

**Table S1.** Causes of death in 1-year

|                 | Parameter | all (n=114) | VCX underdilated (n=47) | VTS underdilated (n=47) | VCX and VTS fully dilated (n=20) |
|-----------------|-----------|-------------|-------------------------|-------------------------|----------------------------------|
| Causes of death | ACLF      | 16 (53%)    | 2 (29%)                 | 9 (64%)                 | 5 (56%)                          |
|                 | sepsis    | 13 (43%)    | 4 (57%)                 | 5 (36%)                 | 4 (44%)                          |
|                 | tumor     | 1 (4%)      | 1 (14%)                 | 0                       | 0                                |

VCX – Viatorrr controlled expansion, VTS – first generation Viatorrr stent-graft, LT – liver transplantation, ACLF – acute-in-chronic liver failure

**Fig. S1.** Competing risk analysis for 1-year mortality.

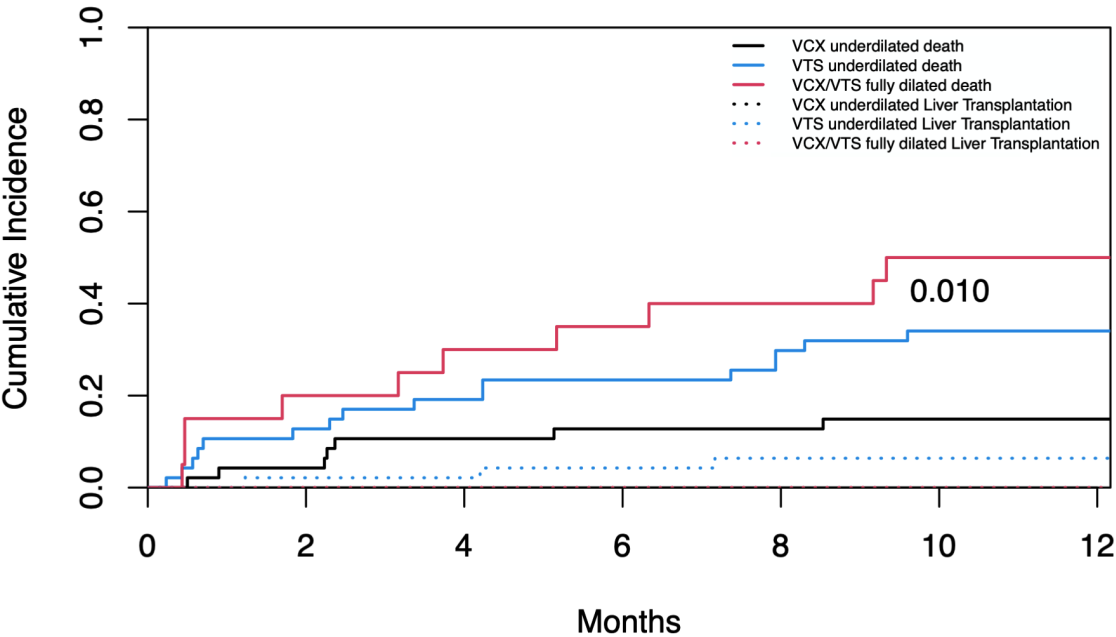

Competing risk analysis for 1-year mortality with liver transplantation as competing event. X-axis shows time between TIPS and death in months. Y-axis shows cumulative incidence. Black: VCX underdilated to 8 mm. Blue: VTS underdilated to 8 mm. Red: VCX/VTS fully dilated to 10 mm. Dotted line: liver transplantation. VCX (Viatorr controlled expansion), VTS (first generation Viatorr stent-graft). P by Fine and Gray method.

Fig. S2. Competing risk analyses for hospitalization.

A) Hepatic Encephalopathy

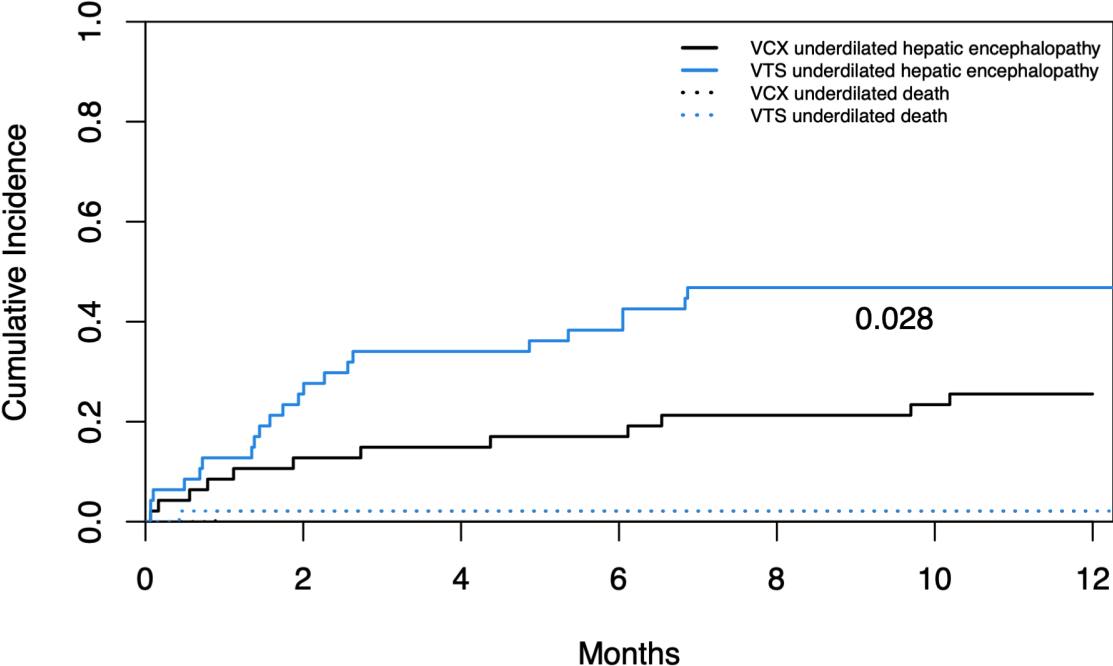

Competing risk analyses for hospitalization for hepatic encephalopathy with death and liver transplantation as competing event. X-axis shows time between TIPS and event in months. Y-axis shows cumulative incidence. Black: VCX underdiluted to 8 mm. Blue: VTS underdiluted to 8 mm. Dotted line: death and liver transplantation. P by Fine and Gray method.

## B) Ascites

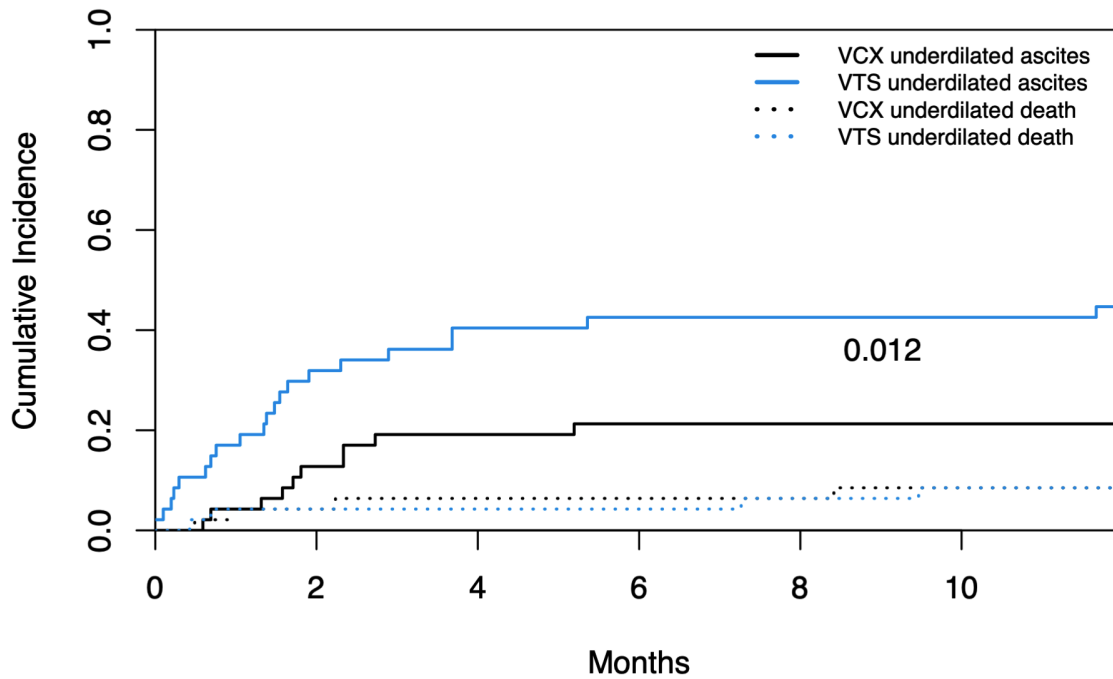

Competing risk analyses for hospitalization for large volume paracentesis with death and liver transplantation as competing event. X-axis shows time between TIPS and event in months. Y-axis shows cumulative incidence. Black: VCX underdilated to 8 mm. Blue: VTS underdilated to 8 mm. Dotted line: death and liver transplantation. P by Fine and Gray method.

### C) Heart Failure

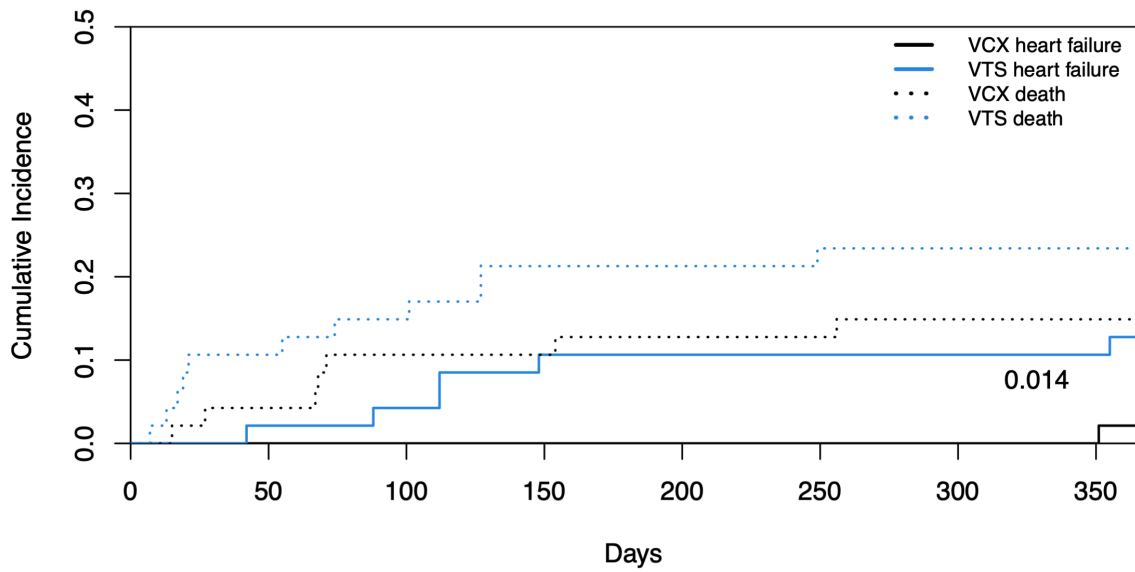

Competing risk analyses for hospitalization for heart failure with death and liver transplantation as competing event. X-axis shows time between TIPS and event in months. Y-axis shows cumulative incidence. Black: VCX underdilated to 8 mm. Blue: VTS underdilated to 8 mm. Dotted line: death and liver transplantation. P by Fine and Gray method.
