# Supplementary material for: Controlled underdilation using novel VIATORR® controlled expansion stents improves survival after transjugular intrahepatic portosystemic shunt implantation
Source: PubMed Central journal article supplement — JHEP Rep. 2021 Mar 3;3(3):100264. doi: 10.1016/j.jhepr.2021.100264 (PMC8113713; doi:10.1016/j.jhepr.2021.100264), 2021-03-03
Supplement: mmc2.pdf [file mmc2.pdf]

## JHEP Reports

### CTAT methods

Tables for a “Complete, Transparent, Accurate and Timely account” (CTAT) are now mandatory for all revised submissions. The aim is to enhance the reproducibility of methods.

- Only include the parts relevant to your study
- Refer to the CTAT in the main text as ‘Supplementary CTAT Table’
- Do not add subheadings
- Add as many rows as needed to include all information
- Only include one item per row

If the CTAT form is not relevant to your study, please outline the reasons why:

|  |
|--|
|  |
|--|

#### 1.1 Antibodies

| Name | Citation | Supplier | Cat no. | Clone no. |
|------|----------|----------|---------|-----------|
| NA   |          |          |         |           |

#### 1.2 Cell lines

| Name | Citation | Supplier | Cat no. | Passage no. | Authentication test method |
|------|----------|----------|---------|-------------|----------------------------|
| NA   |          |          |         |             |                            |

#### 1.3 Organisms

| Name | Citation | Supplier | Strain | Sex | Age | Overall n number |
|------|----------|----------|--------|-----|-----|------------------|
| NA   |          |          |        |     |     |                  |

#### 1.4 Sequence based reagents

| Name | Sequence | Supplier |
|------|----------|----------|
| NA   |          |          |

#### 1.5 Biological samples

| Description | Source | Identifier |
|-------------|--------|------------|
| NA          |        |            |

#### 1.6 Deposited data

| Name of repository | Identifier | Link |
|--------------------|------------|------|
| NA                 |            |      |

## 1.7 Software

| Software name | Manufacturer | Version |
|---------------|--------------|---------|
| SPSS          | IBM          | 25      |
| R             | R Foundation | 4.0.3   |

## 1.8 Other (e.g. drugs, proteins, vectors etc.)

|    |  |  |
|----|--|--|
| NA |  |  |
|    |  |  |

## 1.9 Please provide the details of the corresponding methods author for the manuscript:

Professor Dr. med. Jonel Trebicka, MD, PhD,  
Department of Internal Medicine I, University of Frankfurt, Theodor-Stern-Kai 7,  
60590 Frankfurt. jonel.trebicka@kgu.de, Tel: +49 69 6301 4544, Fax: +49 69 6301 876  
76

## 2.0 Please confirm for randomised controlled trials all versions of the clinical protocol are included in the submission. These will be published online as supplementary information.

This study is not a RCT.
